# Supplementary material
Source: PubMed Central journal article supplement (PMC7834071)
Supplement: mmc1.pdf [file mmc1.pdf]

# Porcine deltacoronavirus nucleocapsid protein species-specifically suppressed IRF7-induced type I interferon production via ubiquitin-proteasomal degradation pathway

Likai Ji<sup>a</sup>, Na Wang<sup>a</sup>, Jingjiao Ma<sup>a</sup>, Yuqiang Cheng<sup>a</sup>, Hengan Wang<sup>a</sup>, Jianhe Sun<sup>a</sup>, Yaxian Yan<sup>a\*</sup>.

<sup>a</sup> School of Agriculture and Biology, Shanghai Jiao Tong University, Shanghai Key Laboratory of Veterinary Biotechnology, Shanghai, People's Republic of China.

\*Corresponding author: School of Agriculture and Biology, Shanghai Jiao Tong University, Shanghai Key Laboratory of Veterinary Biotechnology, Shanghai, People's Republic of China. [yanyaxian@sjtu.edu.cn](mailto:yanyaxian@sjtu.edu.cn).

**Figure S1. PDCoV block the porcine type I IFN production.** (A, B) LLC-PK1 cells were co-transfected with pIFN- $\alpha$ -Luc and pRL-TK (A), or pIFN- $\alpha$ -Luc and pRL-TK (B) for 12 h, and then mock-infected or infected with PDCoV at MOI of 0.5. After 12 h infection, the cells were mock-infected or infected with VSV-GFP for an additional 12 h to perform dual-luciferase assay. All data are presented as means  $\pm$  SD of three independent experiments (\*\* $p < 0.01$ ).

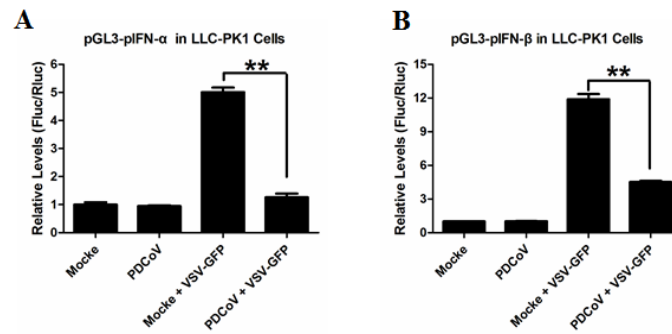

**Figure S2. The sequences of porcine IRF7, human IRF7, and chicken IRF7 were analyzed by Multisequence alignment.** IRF7 sequences from different species were aligned by Clustal software (\*, the lysine was mutated to aspartate in porcine IRF7).

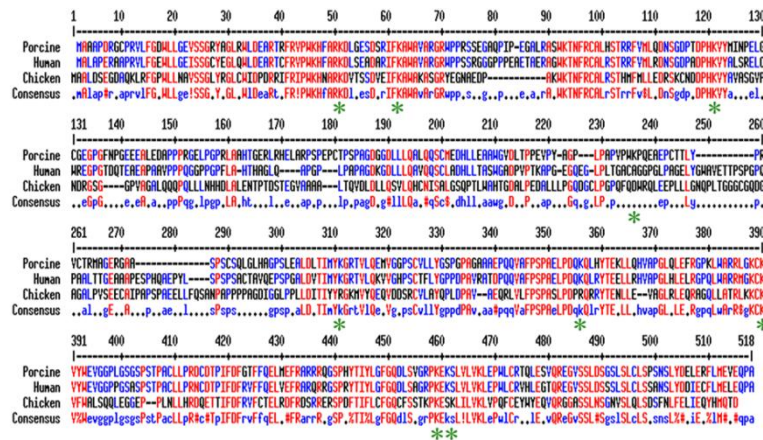

Table S1 The information of deltacoronavirus strains used in this study.

| PDCoV strains                         | The name of PDCoV strain                            | GenBank    |
|---------------------------------------|-----------------------------------------------------|------------|
| Isolated from China<br>(6 strains)    | Porcine deltacoronavirus isolate CHN-AH-2004        | KP757890.1 |
|                                       | Porcine coronavirus HKU15 strain HKU15-44           | JQ065042.2 |
|                                       | Porcine coronavirus HKU15 strain HKU15-155          | JQ065043.2 |
|                                       | Porcine deltacoronavirus isolate CHN-HB-2014        | KP757891.1 |
|                                       | PDCoV_CHJXNI2_2015                                  | KR131621.1 |
|                                       | Porcine deltacoronavirus isolate CHN-JS-2014        | KP757892.1 |
| Isolated from USA<br>(21 strains)     | Porcine deltacoronavirus 8734/USA-IA/2014           | KJ567050.1 |
|                                       | PDCoV_USA_Illinois121_2014                          | KJ481931.1 |
|                                       | PDCoV_USA_Illinois133_2014                          | KJ601777.1 |
|                                       | PDCoV_USA_Illinois134_2014                          | KJ601778.1 |
|                                       | PDCoV_USA_Illinois136_2014                          | KJ601779.1 |
|                                       | PDCoV_USA_Iowa136_2015                              | KX022602.1 |
|                                       | PDCoV_USA_Minnesota140_2015                         | KX022603.1 |
|                                       | PDCoV_USA_Nebraska137_2015                          | KX022602.1 |
|                                       | PDCoV_USA_Nebraska145_2015                          | KX022605.1 |
|                                       | PDCoV_USA_Ohio137_2014                              | KJ601780.1 |
|                                       | Porcine coronavirus HKU15 strain IL2768             | KJ584355.1 |
|                                       | Porcine coronavirus HKU15 strain IN2847             | KJ569769.1 |
|                                       | Porcine coronavirus HKU15 strain KY4813             | KJ584357.1 |
|                                       | Porcine coronavirus HKU15 strain MI6148             | KJ620016.1 |
|                                       | Porcine coronavirus HKU15 strain Michigan/8977/2014 | KM012168.1 |
|                                       | Porcine coronavirus HKU15 strain NE3579             | KJ584359.1 |
|                                       | Porcine coronavirus HKU15 strain OH1987             | KJ462462.1 |
|                                       | Porcine coronavirus HKU15 strain OH11846            | KT381613.1 |
|                                       | Porcine coronavirus HKU15 strain PA3148             | KJ584358.1 |
|                                       | Porcine coronavirus HKU15 strain SD3424             | KJ584356.1 |
| Swine deltacoronavirus OhioCVM1/2014  | KJ769231.1                                          |            |
| Isolated from Thailand<br>(2 strains) | PDCoV_Swine_Thailand_S5011_2015                     | KU051641.1 |
|                                       | PDCoV_Swine_Thailand_S5015L_2015                    | KU051649.1 |
| Isolated from Korea<br>(1 strain)     | Porcine deltacoronavirus KNU14-04                   | KM820765.1 |
| Isolated from Laos<br>(1 strain)      | P1_16_BTL_0115_PDCoV_2016_Lao                       | KX118627.1 |
| Isolated from Bird<br>(1 strain)      | Sparrow coronavirus HKU17 strain HKU17-6124         | JQ065045.1 |
